# Supplementary material for: Bifidobacterium longum CCM 7952 Promotes Epithelial Barrier Function and Prevents Acute DSS-Induced Colitis in Strictly Strain-Specific Manner
Source: PubMed Central journal article supplement (PMC4517903; doi:10.1371/journal.pone.0134050), 2015-07-28
Supplement: pone.0134050.s001.pdf [file pone.0134050.s001.pdf]

S1 Fig.

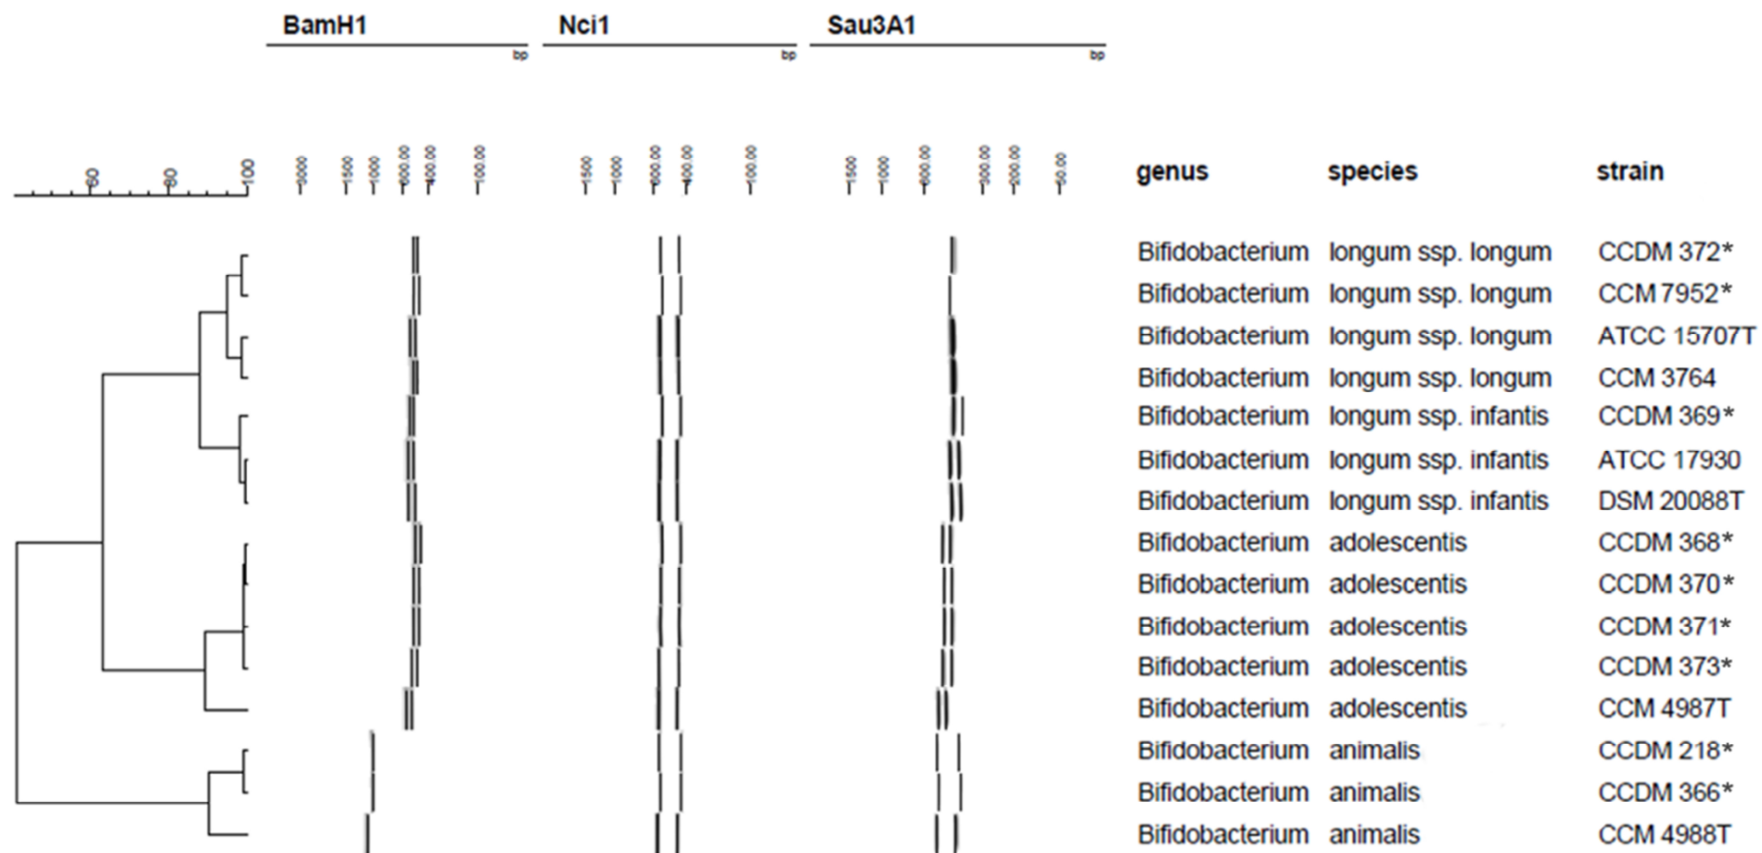

**Amplified ribosomal DNA restriction analysis profile.** Amplified ribosomal DNA restriction analysis profile of nine studied *Bifidobacterium* strains (\*) and six type/collection control strains of corresponding species and subspecies. Dendrogram is generated from restriction of 914 bp amplicon by different enzymes (*Bam*HI, *Nci*I, *Sau*3AI) and based on UPGMA analysis of Pearson correlation coefficients.
