# Supplementary material for: Bifidobacterium longum CCM 7952 Promotes Epithelial Barrier Function and Prevents Acute DSS-Induced Colitis in Strictly Strain-Specific Manner
Source: PubMed Central journal article supplement (PMC4517903; doi:10.1371/journal.pone.0134050), 2015-07-28
Supplement: pone.0134050.s002.pdf [file pone.0134050.s002.pdf]

## **S1 Materials and Methods**

### **Identification of *Bifidobacterium* strain by PCR-based methods**

Nine *Bifidobacterium* strains which have been selected according to their probiotic properties (survival in conditions of gastric acids and bile salt) were classified by molecular-biological methods as described previously [1]. Briefly, DNA was prepared from crude bacterial cell lysates by phenol (pH 7.8) and chloroform: isoamyl alcohol (24 : 1) extraction according to Sambrook and Russell [2]. The purity and concentration of nucleic acids were confirmed by UV spectrophotometry as described previously [3]. The genus *Bifidobacterium* was confirmed by PCR with specific primers Pbi F1/Pbi R2 described by Roy and Sirois [4]. Ten sets of specific primers were used for identification of bifidobacterial species frequently found in human samples: *B. longum* ssp. *longum*, *B. longum* ssp. *infantis*, *B. dentium*, *B. adolescentis*, *B. bifidum*, *B. breve*, *B. catenulatum/pseudocatenulatum*, *B. angulatum*, *B. gallicum* [5] and *B. animalis* [4]. Amplified ribosomal DNA restriction analysis (ARDRA) of genus-specific PCR product using three endonucleases *Bam*HI, *Nci*I (Takara, Shiga, Japan) and *Sau*3AI (Roche Diagnostic, Mannheim, Germany) were used for species and subspecies classification as described previously [1, 3]. Four type and two collection strains used as control in ARDRA analysis were obtained from the Czech Collection of Microorganisms (*B. longum* ssp. *longum* CCM 3764, *B. adolescentis* CCM 4987T, *B. animalis* CCM 4988T), the American Type and Culture Collection (*B. longum* ssp. *longum* ATCC 15707T, *B. longum* ssp. *infantis* ATCC 17930), and the Deutsche Sammlung von Mikroorganismen und Zellkulturen (*B. longum* ssp. *infantis* DSM 20088T). The PCR products were visualised using GelRed<sup>TM</sup> Nucleic Acid Gel Stain (Biotinum, Hayward, CA, USA) and images were obtained by Fluorescent Image Analyser FLA-7000 (Fujifilm Corporation, Tokyo, Japan). The fingerprinting profile was

analysed by the software programme Gel Compare II (2.0 version) and dendrogram were constructed using UPGMA analysis and Pearson correlation coefficient.

## REFERENCES

1. Srutkova D, Spanova A, Spano M, Drab V, Schwarzer M, Kozakova H, et al. Efficiency of PCR-based methods in discriminating *Bifidobacterium longum* ssp. *longum* and *Bifidobacterium longum* ssp. *infantis* strains of human origin. *J Microbiol Methods*. 2011;87(1):10-6. doi: 10.1016/j.mimet.2011.06.014. PubMed PMID: 21756944.
2. Sambrook J, Russell DW. *Molecular cloning: a laboratory manual*. ed. t, editor. Cold Spring Harbor, New York 2001.
3. Krizova J, Spanova A, Rittich B. Evaluation of amplified ribosomal DNA restriction analysis (ARDRA) and species-specific PCR for identification of *Bifidobacterium* species. *Syst Appl Microbiol*. 2006;29(1):36-44. doi: 10.1016/j.syapm.2005.07.003. PubMed PMID: 16423654.
4. Roy D, Sirois S. Molecular differentiation of *Bifidobacterium* species with amplified ribosomal DNA restriction analysis and alignment of short regions of the *ldh* gene. *FEMS Microbiol Lett*. 2000;191(1):17-24. PubMed PMID: 11004394.
5. Matsuki T, Watanabe K, Tanaka R, Fukuda M, Oyaizu H. Distribution of bifidobacterial species in human intestinal microflora examined with 16S rRNA-gene-targeted species-specific primers. *Appl Environ Microbiol*. 1999;65(10):4506-12. PubMed PMID: 10508082; PubMed Central PMCID: PMC91600.
