# Supplementary material for: Bifidobacterium longum CCM 7952 Promotes Epithelial Barrier Function and Prevents Acute DSS-Induced Colitis in Strictly Strain-Specific Manner
Source: PubMed Central journal article supplement (PMC4517903; doi:10.1371/journal.pone.0134050), 2015-07-28
Supplement: pone.0134050.s003.pdf [file pone.0134050.s003.pdf]

**S1 Table**

| <b>Score</b> | <b>Weight loss</b> | <b>Stool consistency</b> | <b>Occult/gross faecal bleeding</b>           |
|--------------|--------------------|--------------------------|-----------------------------------------------|
| <b>0</b>     | None               | Normal                   | Negative                                      |
| <b>1</b>     | 1- 5%              | Normal                   | Negative                                      |
| <b>2</b>     | 5-10%              | Loose                    | Hemocult positive                             |
| <b>3</b>     | 10-20%             | Loose                    | Blood in colon<br>Starting bleeding from anus |
| <b>4</b>     | >20%               | Diarrhoea                | Gross bleeding                                |

**Scoring of disease activity index.** Scoring of disease activity index is combined score of weight loss, stool consistency and bleeding divided by 3. *Normal stool* = well-formed pellets; *Loose stool* = pasty and semi-formed stool that does not adhere to the anus; *Diarrhoea* = liquid stool that adheres to the anus. Modified according to Cooper *et al.* [1].

## **REFERENCES**

1. Cooper HS, Murthy SN, Shah RS, Sedergran DJ. Clinicopathologic study of dextran sulfate sodium experimental murine colitis. *Lab Invest.* 1993;69(2):238-49. PubMed PMID: 8350599.
